# Supplementary material for: Synthetic correlated diffusion imaging hyperintensity delineates clinically significant prostate cancer
Source: PubMed Central journal article supplement (PMC8888633; doi:10.1038/s41598-022-06872-7), 2022-03-01
Supplement: 41598_2022_6872_MOESM1_ESM.pdf [file 41598_2022_6872_MOESM1_ESM.pdf]

**Supplementary Table 1.** Statistical analysis of differences in area under the ROC curve between all modalities. ROC curve titles correspond to those in Figure 2.

| ROC Curve                    | Modalities                                         | A <sub>1</sub> | A <sub>2</sub> | r <sub>P</sub> | r <sub>N</sub> | z        | p (two-tailed) |
|------------------------------|----------------------------------------------------|----------------|----------------|----------------|----------------|----------|----------------|
| csPCa vs. Healthy            | CDI <sup>s</sup> , CDI <sub>t</sub> <sup>s</sup>   | 0.9167         | 0.9189         | 0.9982         | 0.9802         | 2.3137   | 0.0207         |
|                              | CDI <sup>s</sup> , ADC                             | 0.9167         | 0.8859         | 0.1886         | 0.2850         | 13.0366  | 0.0000         |
|                              | CDI <sup>s</sup> , T2w                             | 0.9167         | 0.7130         | 0.1406         | 0.0854         | 113.9934 | < 0.0001       |
|                              | CDI <sup>s</sup> , K <sup>trans</sup>              | 0.9167         | 0.7461         | 0.0057         | 0.0339         | 66.0474  | < 0.0001       |
|                              | CDI <sub>t</sub> <sup>s</sup> , ADC                | 0.9189         | 0.8859         | 0.1994         | 0.2857         | 14.0423  | < 0.0001       |
|                              | CDI <sub>t</sub> <sup>s</sup> , T2w                | 0.9189         | 0.7130         | 0.1464         | 0.0861         | 116.4832 | < 0.0001       |
|                              | CDI <sub>t</sub> <sup>s</sup> , K <sup>trans</sup> | 0.9189         | 0.7461         | 0.0041         | 0.0466         | 67.2891  | < 0.0001       |
|                              | ADC, T2w                                           | 0.8859         | 0.7130         | 0.4009         | 0.6696         | 100.0295 | < 0.0001       |
|                              | ADC, K <sup>trans</sup>                            | 0.8859         | 0.7461         | 0.1428         | 0.0295         | 52.2421  | < 0.0001       |
|                              | T2w, K <sup>trans</sup>                            | 0.7130         | 0.7461         | 0.1922         | 0.0527         | 16.4462  | < 0.0001       |
| csPCa vs. insPCa             | CDI <sup>s</sup> , CDI <sub>t</sub> <sup>s</sup>   | 0.7552         | 0.7555         | 0.9982         | 0.9823         | 0.1956   | 0.8449         |
|                              | CDI <sup>s</sup> , ADC                             | 0.7552         | 0.6940         | 0.1886         | 0.1887         | 16.3557  | < 0.0001       |
|                              | CDI <sup>s</sup> , T2w                             | 0.7552         | 0.5535         | 0.1406         | 0.0037         | 70.1154  | < 0.0001       |
|                              | CDI <sup>s</sup> , K <sup>trans</sup>              | 0.7552         | 0.6208         | 0.0057         | 0.1245         | 37.3343  | < 0.0001       |
|                              | CDI <sub>t</sub> <sup>s</sup> , ADC                | 0.7555         | 0.6940         | 0.1994         | 0.1940         | 16.5100  | < 0.0001       |
|                              | CDI <sub>t</sub> <sup>s</sup> , T2w                | 0.7555         | 0.5535         | 0.1464         | 0.0050         | 70.3044  | < 0.0001       |
|                              | CDI <sub>t</sub> <sup>s</sup> , K <sup>trans</sup> | 0.7555         | 0.6208         | 0.0041         | 0.1134         | 37.3052  | < 0.0001       |
|                              | ADC, T2w                                           | 0.6940         | 0.5535         | 0.4009         | 0.6527         | 52.4005  | < 0.0001       |
|                              | ADC, K <sup>trans</sup>                            | 0.6940         | 0.6208         | 0.1428         | 0.1707         | 20.4215  | < 0.0001       |
|                              | T2w, K <sup>trans</sup>                            | 0.5535         | 0.6208         | 0.1922         | 0.0028         | 27.0110  | < 0.0001       |
| csPCa vs. insPCa and Healthy | CDI <sup>s</sup> , CDI <sub>t</sub> <sup>s</sup>   | 0.9132         | 0.9153         | 0.9982         | 0.9825         | 2.2405   | 0.0251         |
|                              | CDI <sup>s</sup> , ADC                             | 0.9132         | 0.8818         | 0.1886         | 0.1881         | 12.8230  | < 0.0001       |
|                              | CDI <sup>s</sup> , T2w                             | 0.9132         | 0.7100         | 0.1406         | 0.0238         | 110.9176 | < 0.0001       |
|                              | CDI <sup>s</sup> , K <sup>trans</sup>              | 0.9132         | 0.7429         | 0.0057         | 0.1496         | 66.6417  | < 0.0001       |
|                              | CDI <sub>t</sub> <sup>s</sup> , ADC                | 0.9153         | 0.8818         | 0.1994         | 0.1966         | 13.8127  | < 0.0001       |
|                              | CDI <sub>t</sub> <sup>s</sup> , T2w                | 0.9153         | 0.7100         | 0.1464         | 0.0249         | 113.1965 | < 0.0001       |
|                              | CDI <sub>t</sub> <sup>s</sup> , K <sup>trans</sup> | 0.9153         | 0.7429         | 0.0041         | 0.1420         | 67.6887  | < 0.0001       |
|                              | ADC, T2w                                           | 0.8818         | 0.7100         | 0.4009         | 0.6335         | 97.1469  | < 0.0001       |
|                              | ADC, K <sup>trans</sup>                            | 0.8818         | 0.7429         | 0.1428         | 0.3370         | 55.6735  | < 0.0001       |
|                              | T2w, K <sup>trans</sup>                            | 0.7100         | 0.7429         | 0.1922         | 0.0943         | 16.4136  | < 0.0001       |
| csPCa and insPCa vs. Healthy | CDI <sup>s</sup> , CDI <sub>t</sub> <sup>s</sup>   | 0.8282         | 0.8345         | 0.9959         | 0.9802         | 9.3085   | < 0.0001       |
|                              | CDI <sup>s</sup> , ADC                             | 0.8282         | 0.8131         | 0.1550         | 0.2850         | 8.8399   | < 0.0001       |
|                              | CDI <sup>s</sup> , T2w                             | 0.8282         | 0.6810         | 0.0673         | 0.0854         | 108.2148 | < 0.0001       |
|                              | CDI <sup>s</sup> , K <sup>trans</sup>              | 0.8282         | 0.6772         | 0.0442         | 0.0339         | 85.7535  | < 0.0001       |
|                              | CDI <sub>t</sub> <sup>s</sup> , ADC                | 0.8345         | 0.8131         | 0.1600         | 0.2857         | 12.5640  | < 0.0001       |
|                              | CDI <sub>t</sub> <sup>s</sup> , T2w                | 0.8345         | 0.6810         | 0.0728         | 0.0861         | 114.2608 | < 0.0001       |
|                              | CDI <sub>t</sub> <sup>s</sup> , K <sup>trans</sup> | 0.8345         | 0.6772         | 0.0434         | 0.0466         | 90.1805  | < 0.0001       |
|                              | ADC, T2w                                           | 0.8131         | 0.6810         | 0.6176         | 0.6696         | 114.0235 | < 0.0001       |
|                              | ADC, K <sup>trans</sup>                            | 0.8131         | 0.6772         | 0.2279         | 0.0295         | 79.4537  | < 0.0001       |
|                              | T2w, K <sup>trans</sup>                            | 0.6810         | 0.6772         | 0.0054         | 0.0527         | 3.0826   | 0.0021         |
